# Supplementary material for: Development of an Anti-HER2 Single-Chain Variable Antibody Fragment Construct for High-Yield Soluble Expression in Escherichia coli and One-Step Chromatographic Purification
Source: MDPI journal article supplement (doi:10.3390/biom13101508), 2023-10-11

# Supplementary Materials for

Article

## Development of an Anti-HER2 Single-Chain Variable Antibody Fragment Construct for High-Yield Soluble Expression in *Escherichia coli* and One-Step Chromatographic Purification

Kyu Tae Byun <sup>1,†</sup>, Boram Kim <sup>1,†</sup>, Junmin Cho <sup>1</sup>, Inbeom Lee <sup>1</sup>, Myung Gu Lee <sup>2</sup>, Dongsun Park <sup>3</sup>, Tae-Bong Kang <sup>1,4</sup>, Hyung-Sik Won <sup>1,4</sup> and Chan Gil Kim <sup>1,\*</sup>

<sup>1</sup> Department of Biotechnology, Research Institute (RIBHS), College of Biomedical and Health Science, Konkuk University, Chungju, Chungbuk 27478, Republic of Korea

<sup>2</sup> Konkukbio Inc., Konkuk University, Chungju, Chungbuk 27478, Republic of Korea

<sup>3</sup> Department of Biology Education, Korea National University of Education, Cheongju, Chungbuk 28173, Republic of Korea

<sup>4</sup> BK21 Project Team, Department of Applied Life Science, Graduate School, Konkuk University, Chungju, Chungbuk 27478, Republic of Korea

\* Correspondence: changil.kim@kku.ac.kr (C.K.)

† These authors contributed equally to this work.

**Abstract:** Although single-chain variable fragment (scFv) is recognized as a highly versatile scaffold of recombinant antibody fragment molecules, its overexpression in *Escherichia coli* often leads to formation of inclusion bodies. To address this issue, we devised and tested four different constructs, named v21 to v24, for producing anti-human epidermal growth factor receptor 2 (HER2) scFv. Among them, the v24 construct obtained from N-terminal fusion of maltose-binding protein (MBP) and subsequent tobacco etch virus protease (TEV) was identified as the most efficient construct for production of anti-HER2 scFv. Aided by the MBP tag, high-yield soluble expression was ensured and soluble scFv was liberated in cells via autonomous proteolytic cleavage by endogenously expressed TEV. The isolated scFv containing a C-terminal hexahistidine tag could be purified through a one-step purification via nickel-affinity chromatography. The purified scFv exhibited a strong (nanomolar  $K_d$ ) affinity to HER2 both *in vitro* and in cells. Structural and functional stabilities of the scFv during storage for more than one month were also assured. Given the great utility of anti-HER2 scFv as a basic platform for developing therapeutic and diagnostic agents for cancers, the v24 construct and methods presented in this study are expected to provide a better manufacturing system for producing anti-HER2 scFv with various industrial applications.

**Keywords:** antibody; single-chain variable fragment (scFv); human epidermal growth factor receptor 2 (HER2); bacterial production; *Escherichia coli*; maltose-binding protein (MBP); tobacco etch virus (TEV) protease

---

# Supplementary Figure S1

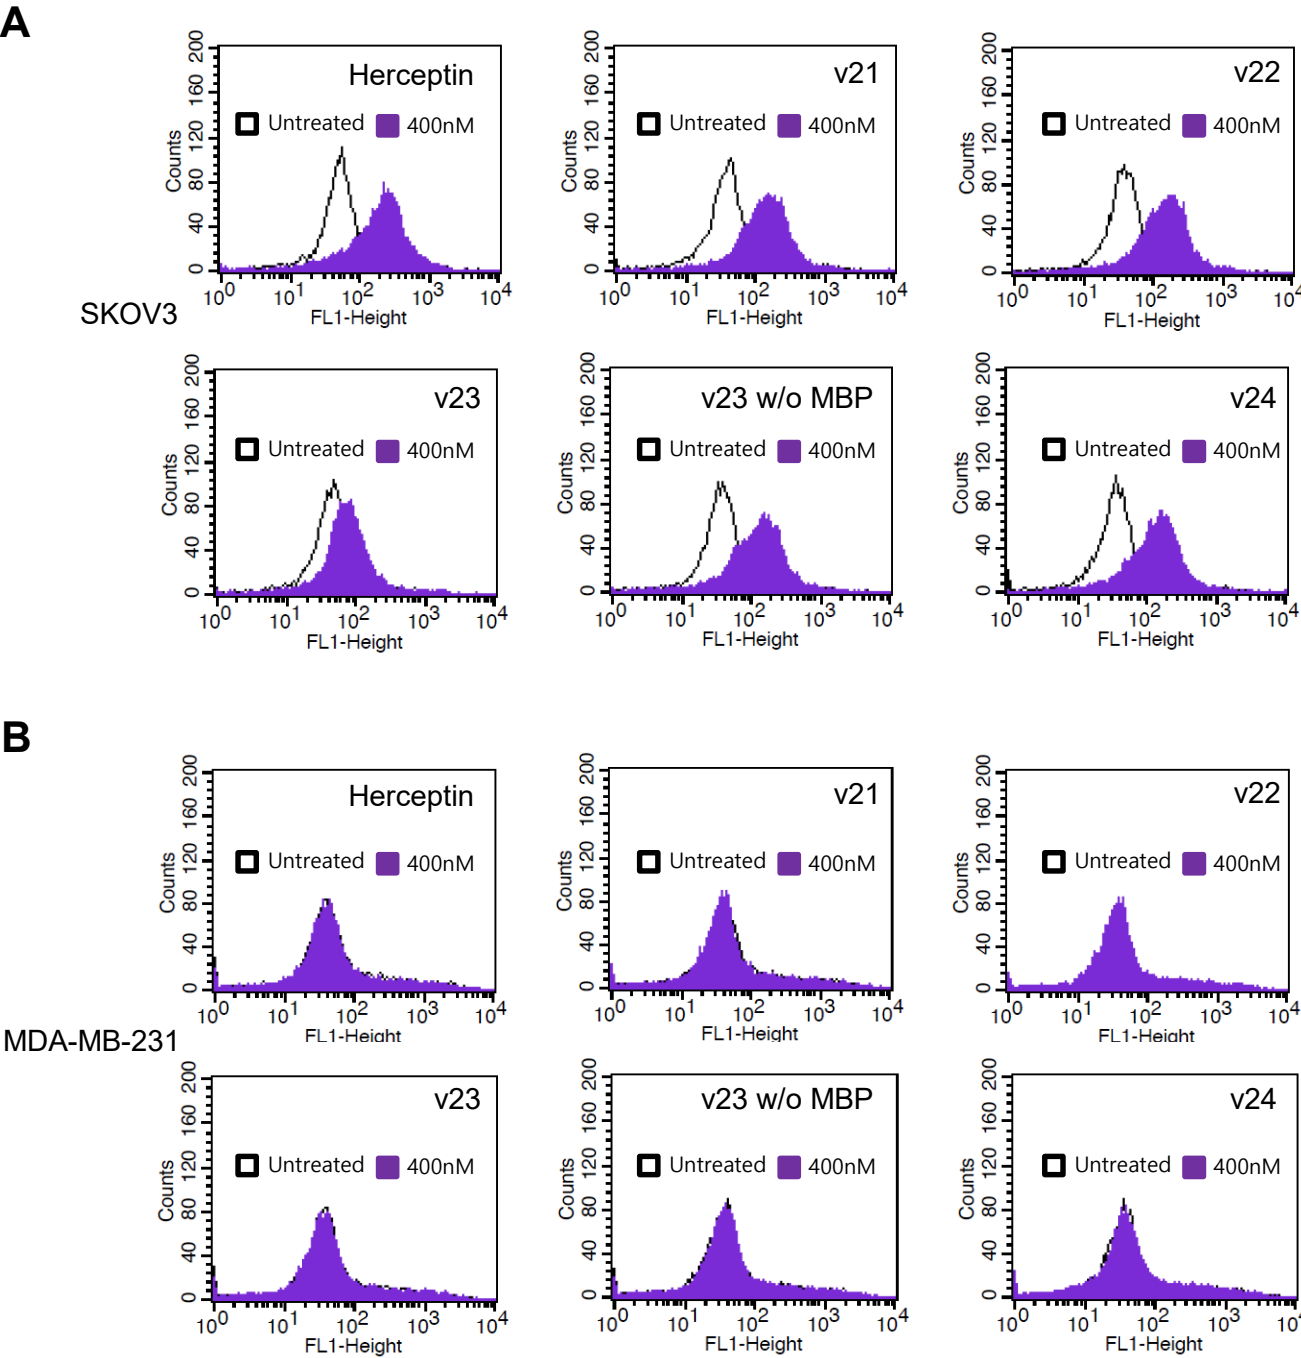

**Supplementary Figure S1.** Raw data histograms of FACS analysis for binding of trastuzumab (Herceptin®) and v21–v24 products to SKOV3 (A) and MDA-MB-231 (B) cells.

# Supplementary Table S1

**Supplementary Table S1.** Amino acid sequences of recombinant proteins expressed by v21–v24 constructs (for v23 and v24, regions for final products after enzymatic cleavage are indicated in red).

| Construct | Amino acid sequence expressed by the construct                                                                                                                                                                                                                                                                                                                                                                                                                                                                                                                                                                                                                                                                                                                                                                                                                                                                                                                                                                  |
|-----------|-----------------------------------------------------------------------------------------------------------------------------------------------------------------------------------------------------------------------------------------------------------------------------------------------------------------------------------------------------------------------------------------------------------------------------------------------------------------------------------------------------------------------------------------------------------------------------------------------------------------------------------------------------------------------------------------------------------------------------------------------------------------------------------------------------------------------------------------------------------------------------------------------------------------------------------------------------------------------------------------------------------------|
| v21       | MDIQMTQSPSSLSASVGDRVITICRASQDVNTAVAWYQQKPGKAPKLLIYSASFLYSGVPS<br>RFSGSRSGTDFTLTISLQPEDFATYYCQQHYTTPPTFGQGKTKVEIKRSGGGGSGGGGSG<br>GGGSEVQLVESGGGLVQPGGSLRLSCAASGFNIKDTYIHWVRQAPGKGLEWVARIYPTNG<br>YTRYADSVKGRFTISADTSKNTAYLQMNSLRAEDTAVYYCSRWGGDGFYAMDYWGQGT<br>LVTVSSASGSEQKLISEEDLHHHHHHTGGSTSELEFVD                                                                                                                                                                                                                                                                                                                                                                                                                                                                                                                                                                                                                                                                                                           |
| v22       | MKYLLPTAAAGLLLLAAQPAMAHMDIQMTQSPSSLSASVGDRVITICRASQDVNTAVAWYQ<br>QKPGKAPKLLIYSASFLYSGVPSRFSGSRSGTDFTLTISLQPEDFATYYCQQHYTTPPTFG<br>QGKTKVEIKRSGGGGSGGGGSGGGGSEVQLVESGGGLVQPGGSLRLSCAASGFNIKDTYI<br>HWVRQAPGKGLEWVARIYPTNGYTRYADSVKGRFTISADTSKNTAYLQMNSLRAEDTAVYYC<br>SRWGGDGFYAMDYWGQGT<br>LVTVSSASGSEQKLISEEDLHHHHHHTGGSTSELEFVD                                                                                                                                                                                                                                                                                                                                                                                                                                                                                                                                                                                                                                                                                |
| v23       | MKTEEGKLVWINGDKGYNGLAEVGKKFEKDTGIKVTVEHPDKLEEKFPQVAATGDGPDII<br>F<br>WAHDFRGGYAQSGLLAEITPDKAFQDKLYPFTWDAVRYNGKLIAYPIAVEALSLIYNKDLLPN<br>PPKTWEEIPALDKELKAKGKSALMFNLQEPYFTWPLIAADGGYAFKYENGKYDIKDVGV<br>DN<br>AGAKAGLTFLVDLIKHKHMNADTDYSIAEAAFNKGETAMTINGPWAWSNIDTSKVNYGVT<br>VL<br>PTFKGQPSKPFVGVLSAGINAASPNKELAKEFLENYLLTDEGLEAVNKDKPLGAVALKSY<br>EE<br>ELAKDPRIATMENAQKGEIMPNIQMSAFWYAVRTAVINAASGRQTVDEALKDAQTNSSS<br>GENLYFQ <b>GD</b> IQMTQSPSSLSASVGDRVITICRASQDVNTAVAWYQQKPGKAPKLLIYSASFL<br>YSGVPSRFSGSRSGTDFTLTISLQPEDFATYYCQQHYTTPPTFGQGKTKVEIKRSGGGGSG<br>GGGSGGGGSEVQLVESGGGLVQPGGSLRLSCAASGFNIKDTYIHWVRQAPGKGLEWVARI<br>YPTNGYTRYADSVKGRFTISADTSKNTAYLQMNSLRAEDTAVYYCSRWGGDGFYAMDYWG<br>QGT<br>LVTVSSASGSEQKLISEEDLHHHHHHTGGSTSELEFVD                                                                                                                                                                                                                                                               |
| v24       | MKTEEGKLVWINGDKGYNGLAEVGKKFEKDTGIKVTVEHPDKLEEKFPQVAATGDGPDII<br>F<br>WAHDFRGGYAQSGLLAEITPDKAFQDKLYPFTWDAVRYNGKLIAYPIAVEALSLIYNKDLLPN<br>PPKTWEEIPALDKELKAKGKSALMFNLQEPYFTWPLIAADGGYAFKYENGKYDIKDVGV<br>DN<br>AGAKAGLTFLVDLIKHKHMNADTDYSIAEAAFNKGETAMTINGPWAWSNIDTSKVNYGVT<br>VL<br>PTFKGQPSKPFVGVLSAGINAASPNKELAKEFLENYLLTDEGLEAVNKDKPLGAVALKSY<br>EE<br>ELAKDPRIATMENAQKGEIMPNIQMSAFWYAVRTAVINAASGRQTVDEALKDAQTNSSS<br>GESLFKGRDYNPISSTICHLTNESDGHTTSLYGIGFGPFIITNKHLFRRNNGTLLVQSLHGV<br>FKVKNTTTLQQLIDGRDMIIRMPKDFPPFPQKLKFREPQREERICLVTTNFQTKSMSSMV<br>SDTSCTFPSSDGIFWKHWIQTQDGGCGSPLVSTRDGFIVGIHSASNFTNTNNYFTSVPKNF<br>MELLTNQEAQQWVSGWRLNADSVLWGGHKVFMVKPEEPFQPVKEATQLMNGSSSSGEN<br>LYFQ <b>GD</b> IQMTQSPSSLSASVGDRVITICRASQDVNTAVAWYQQKPGKAPKLLIYSASFLYSG<br>VPSRFSGSRSGTDFTLTISLQPEDFATYYCQQHYTTPPTFGQGKTKVEIKRSGGGGSGGGG<br>SGGGGSEVQLVESGGGLVQPGGSLRLSCAASGFNIKDTYIHWVRQAPGKGLEWVARIYPT<br>NGYTRYADSVKGRFTISADTSKNTAYLQMNSLRAEDTAVYYCSRWGGDGFYAMDYWGQ<br>GT<br>LVTVSSASGSEQKLISEEDLHHHHHHTGGSTSELEFVD |

**Original Gel  
Images  
used to  
generate  
Figure 2**

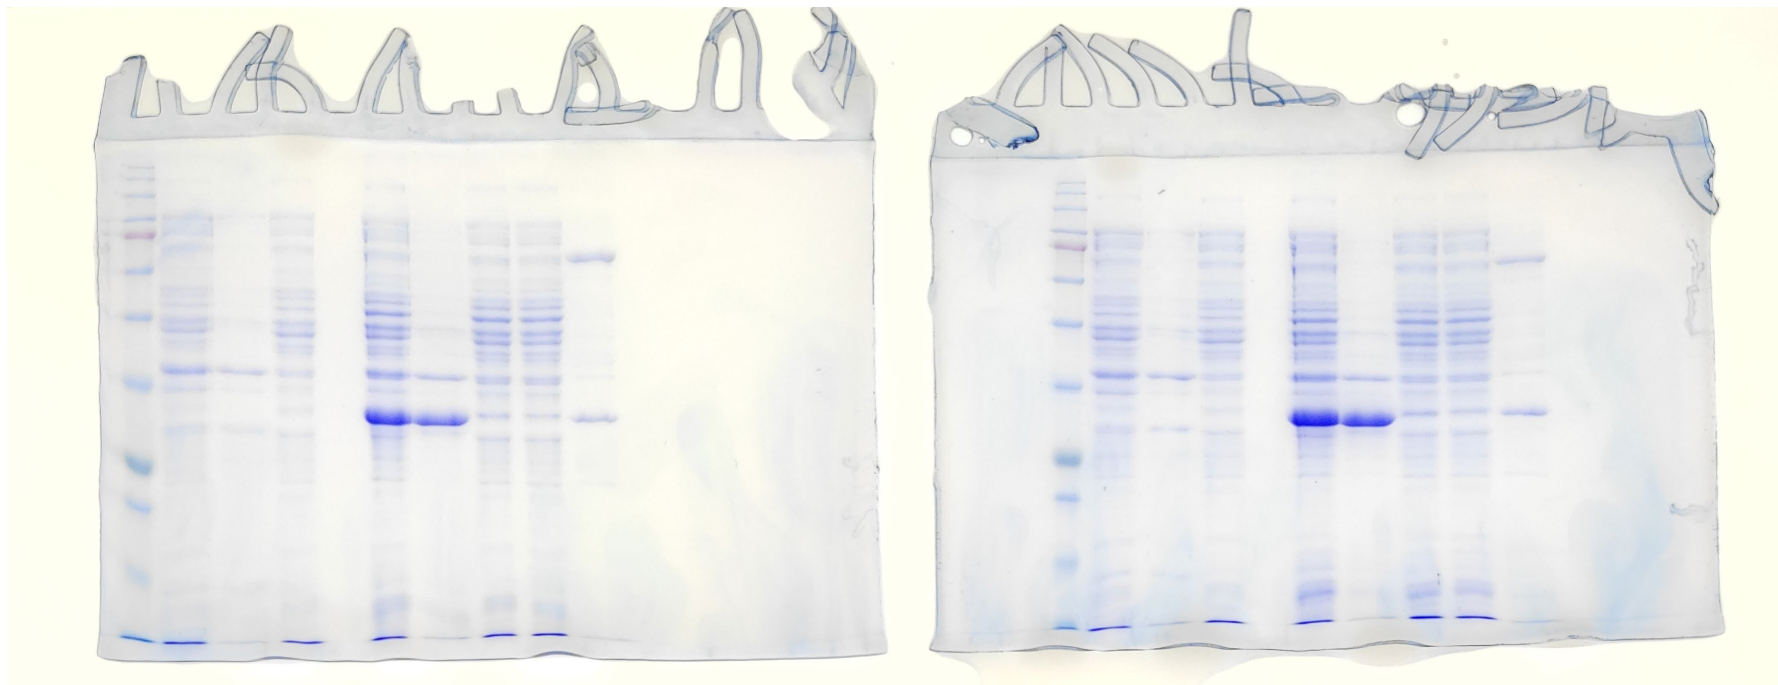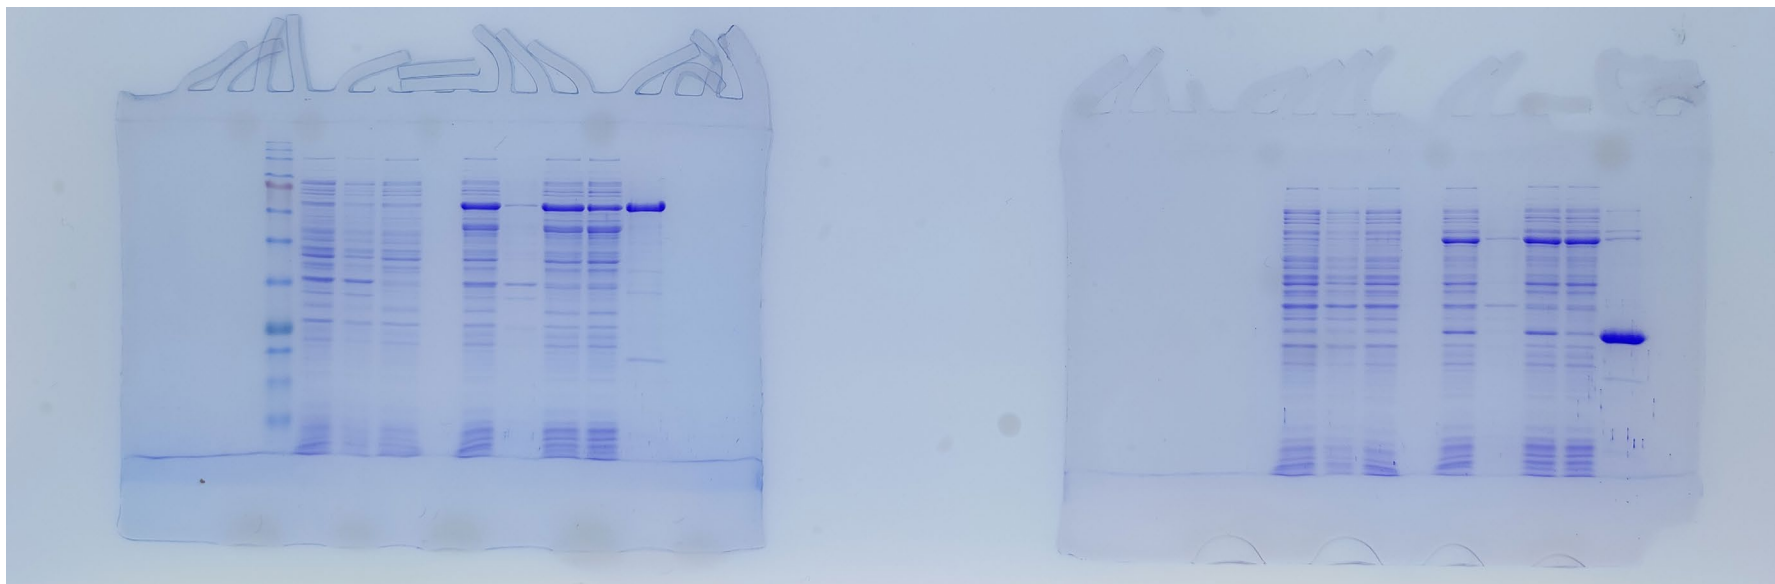

**Original Gel  
Images  
used to  
generate  
Figure 3**

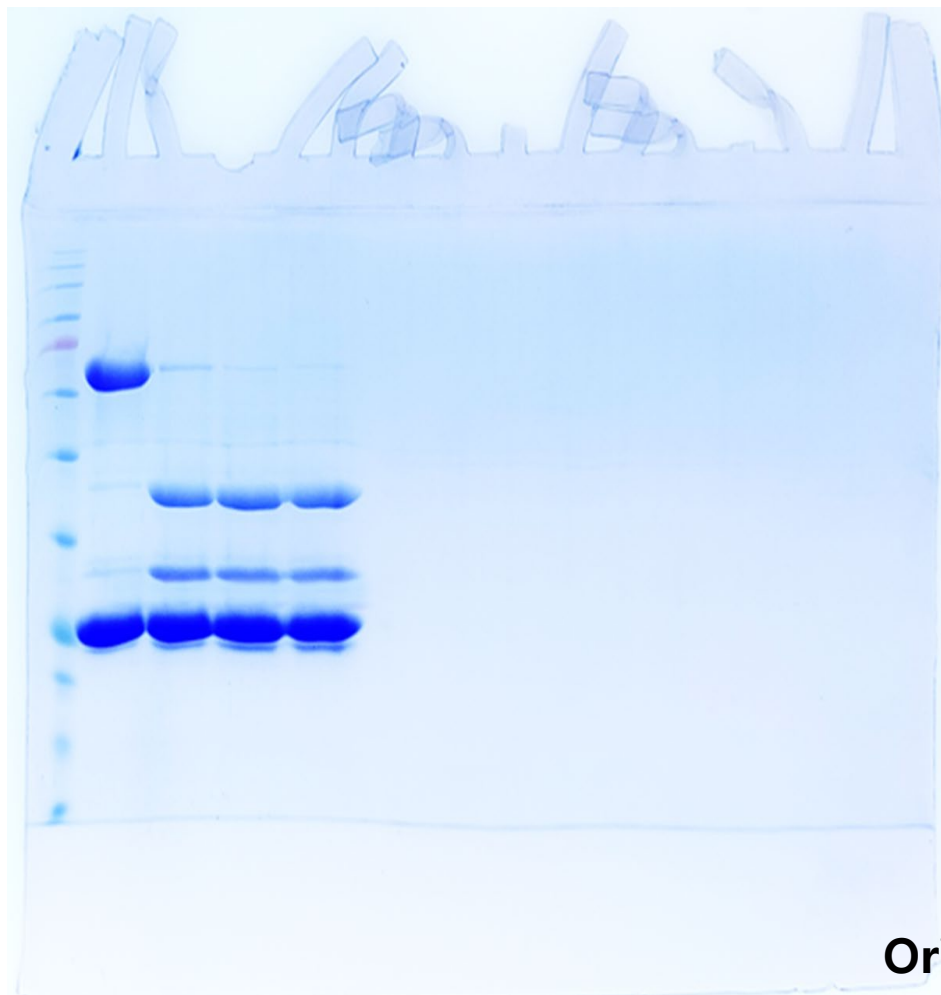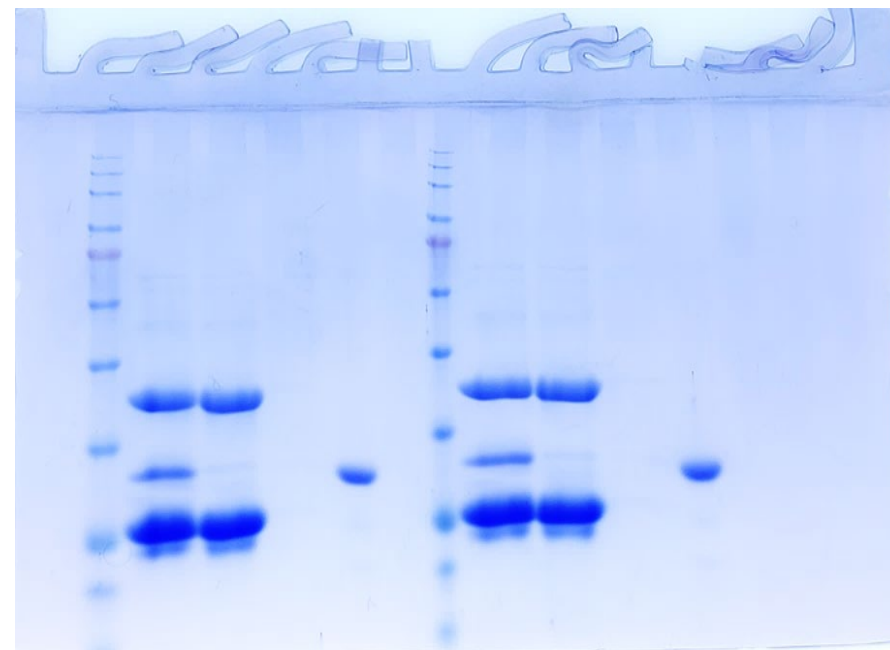

**Original Gel  
Image used  
to generate  
Figure 5**

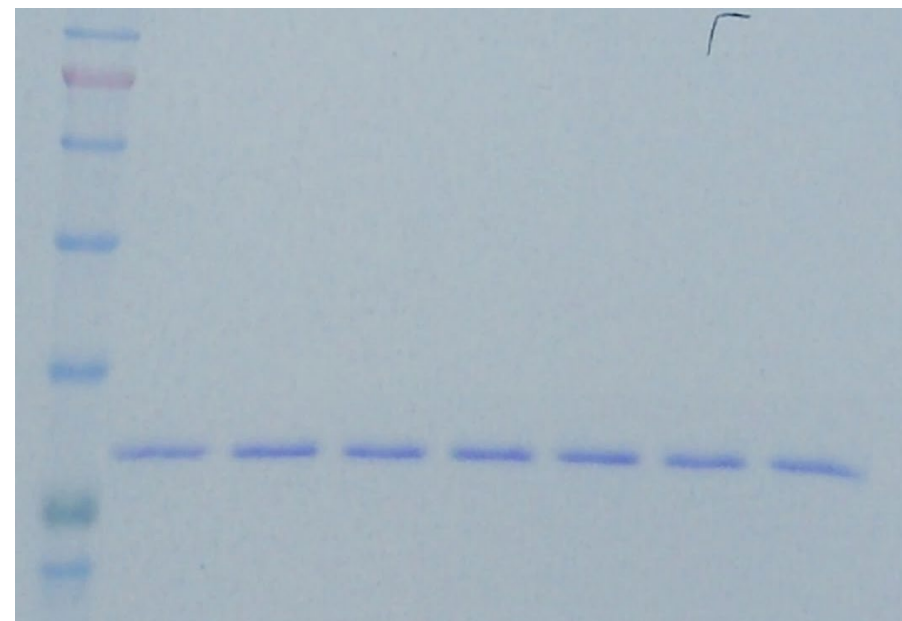

Supplement: s1 [file s1]
